# Supplementary material for: Tremor after long term lithium treatment; is it cortical myoclonus?
Source: PubMed Central journal article supplement (PMC6532190; doi:10.1186/s40673-019-0100-y), 2019-05-22

Cortico-muscular latencies  
for JLA and CC shown in figures 1,2,3 &4

Analysis performed in Spike 2 (Version 9.04) software

# Case 1 Figure 1,B

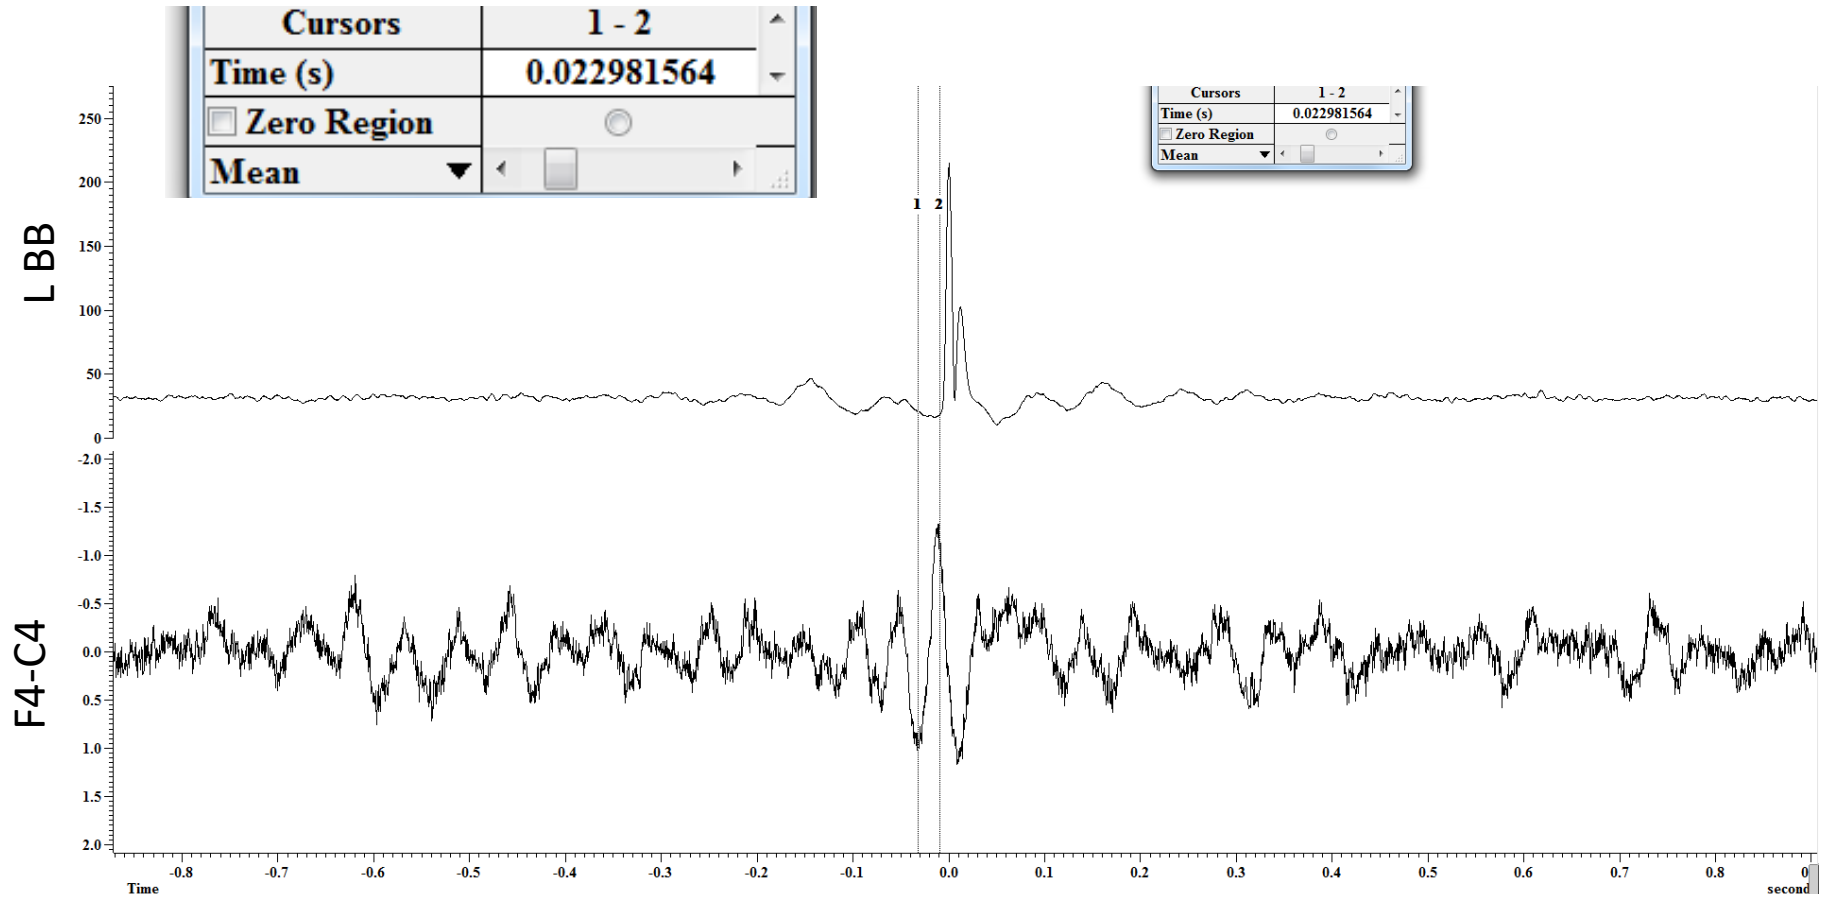

# Case 2 figure 2,A

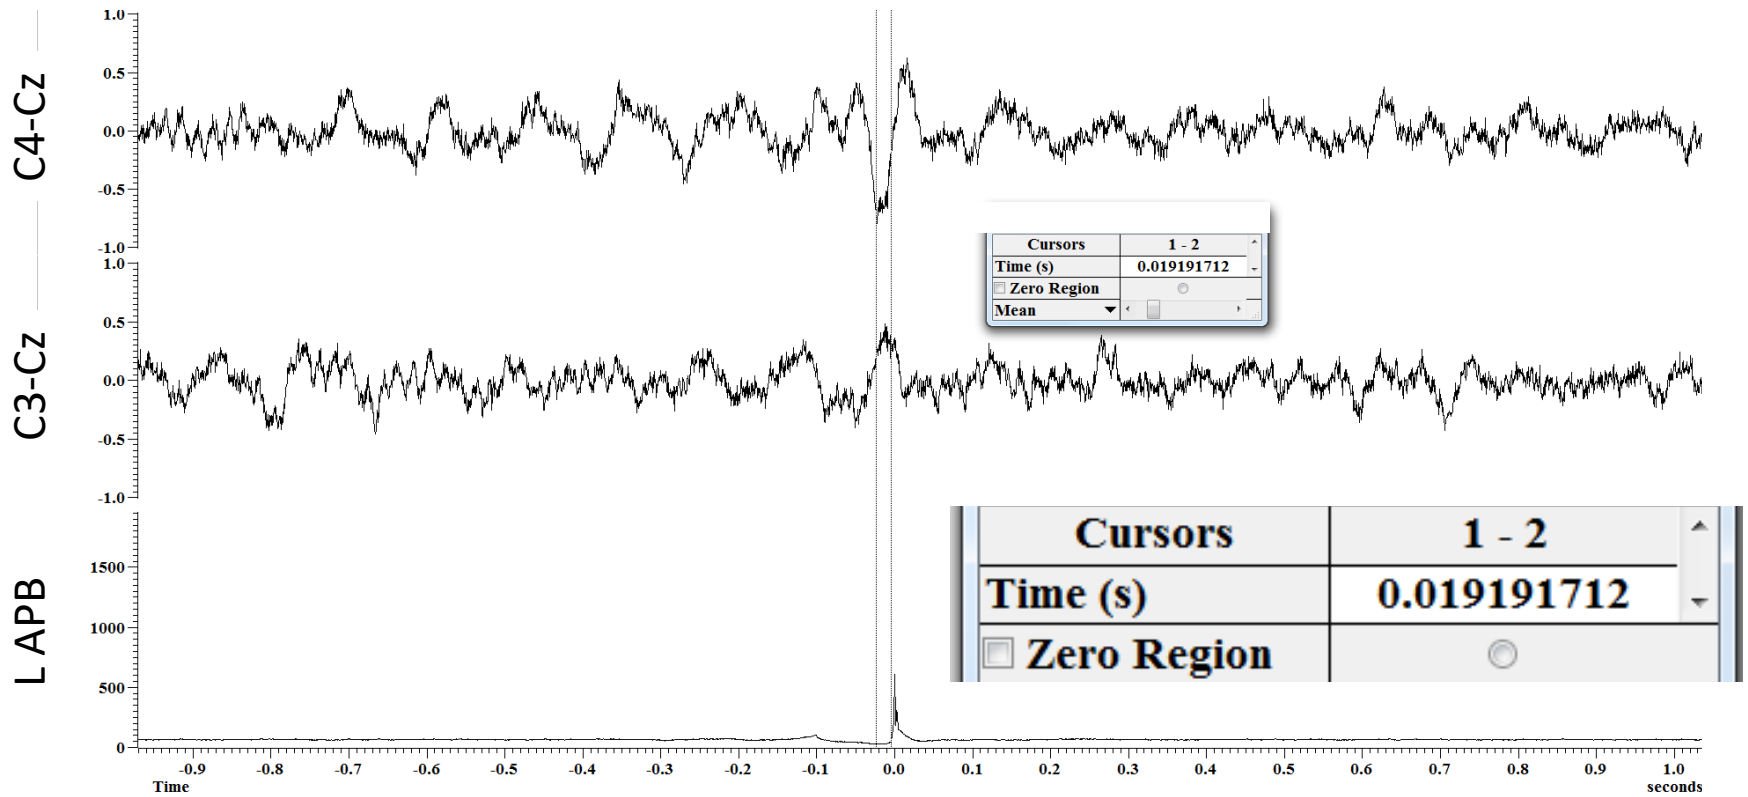

# Case 3 figure 2,B

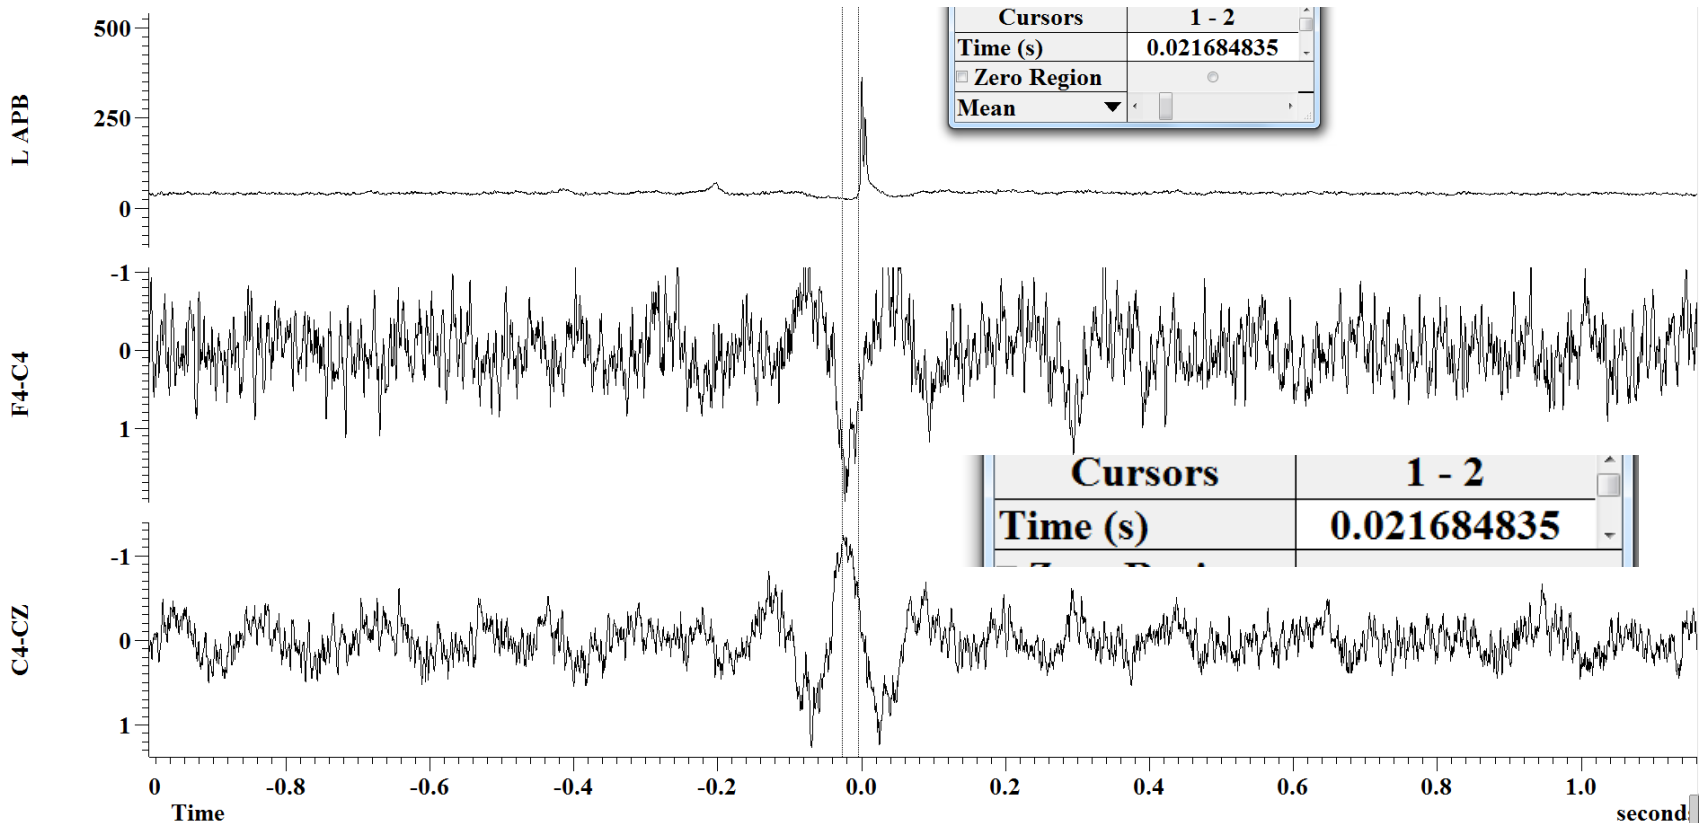

# Case 4 Figure 2,C

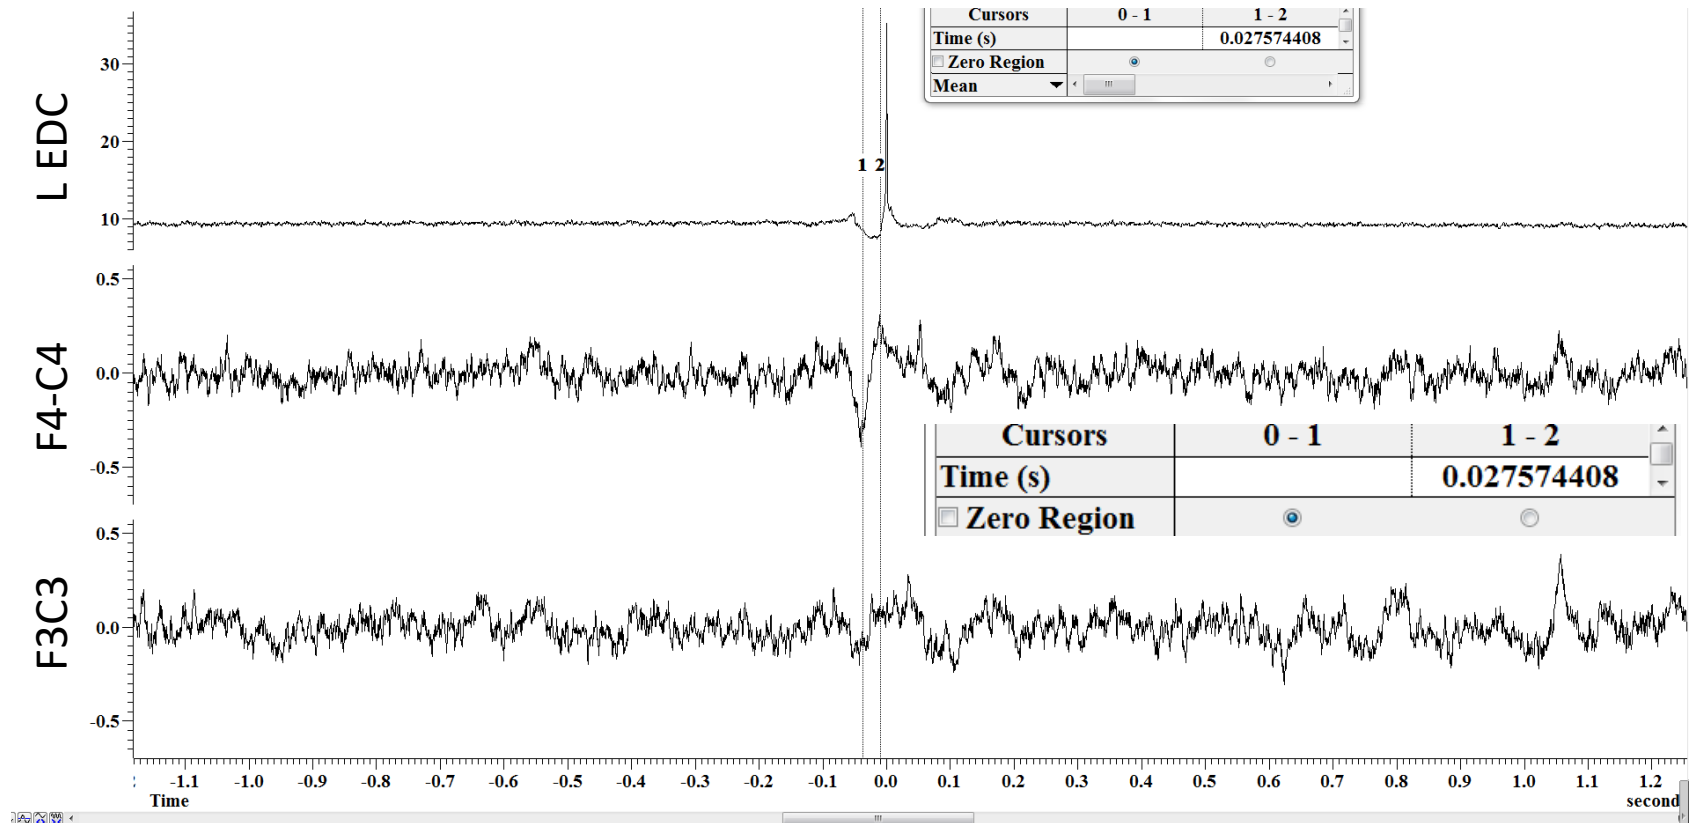

# Case 5 Figure 2,D

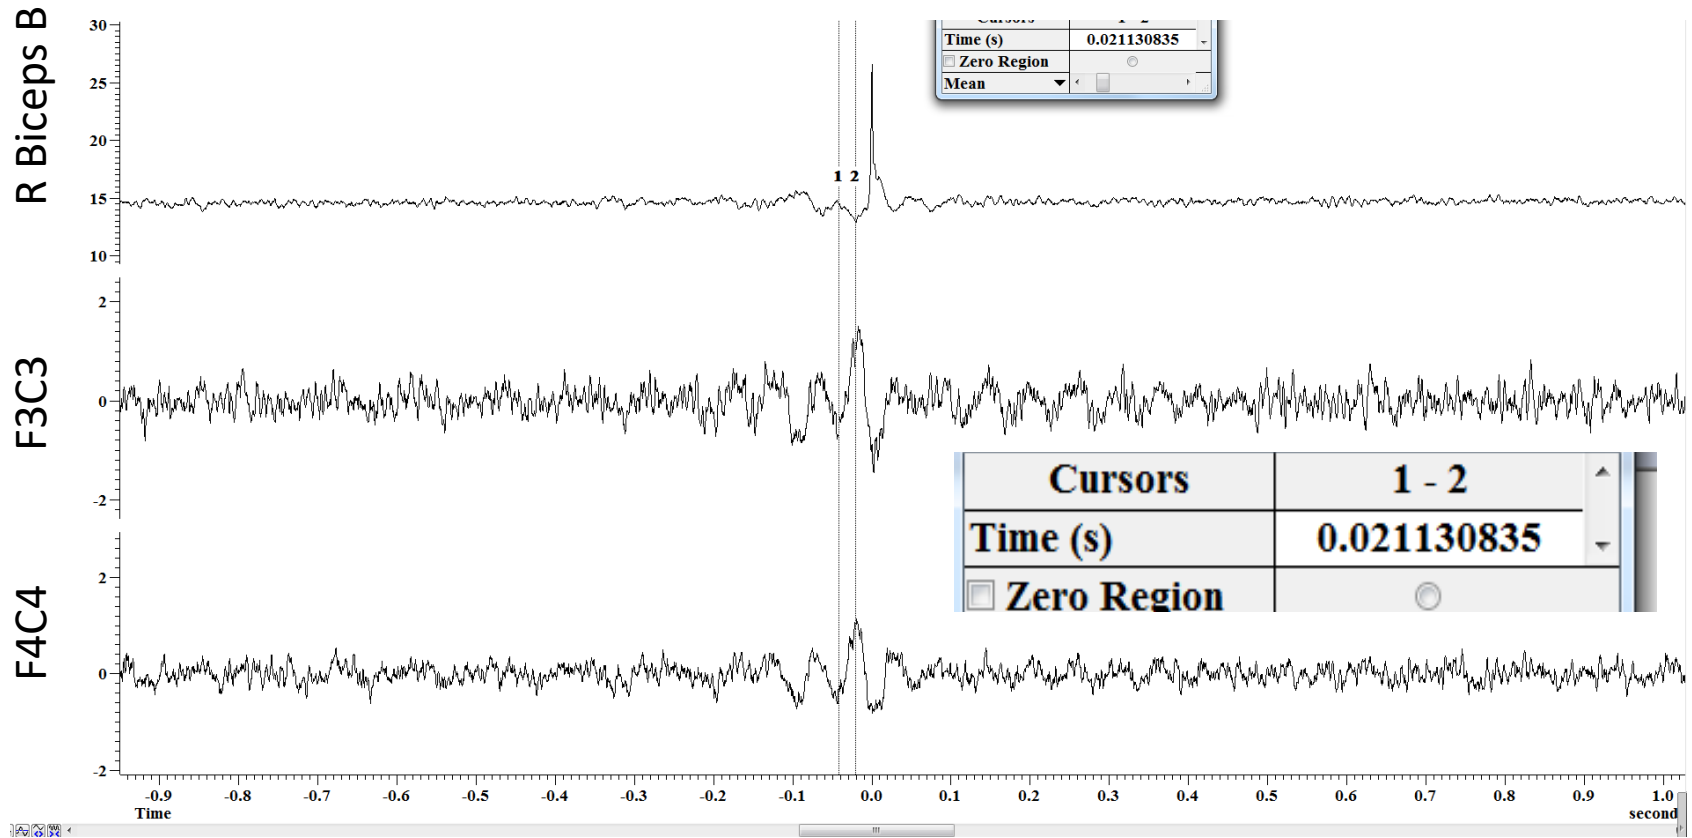

# Case 6 Figure 3,B

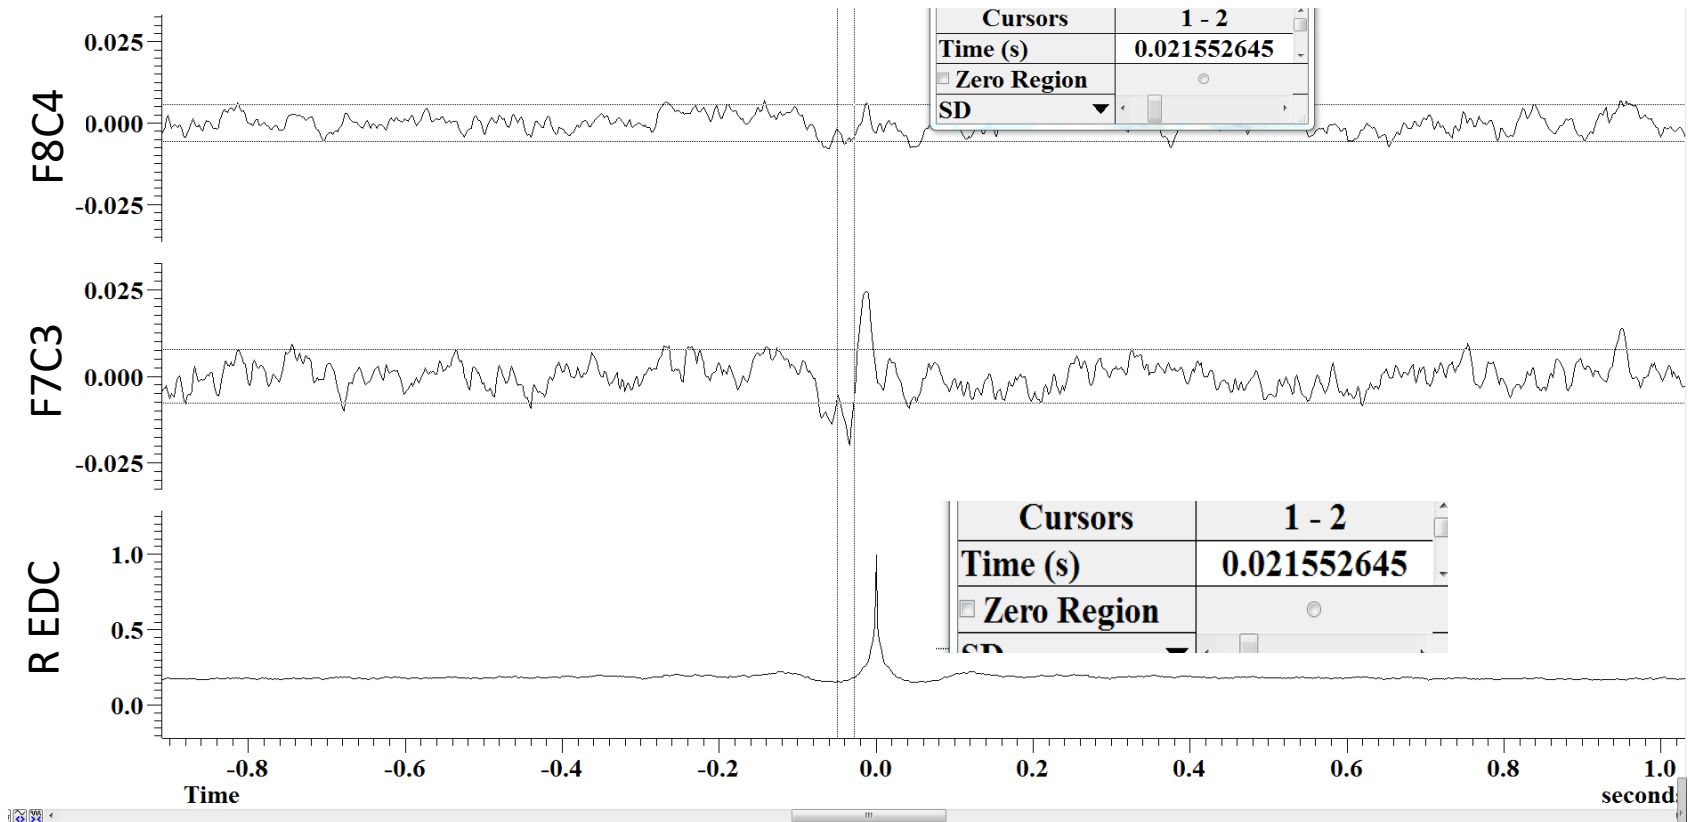

# Case 7 Figure 4,

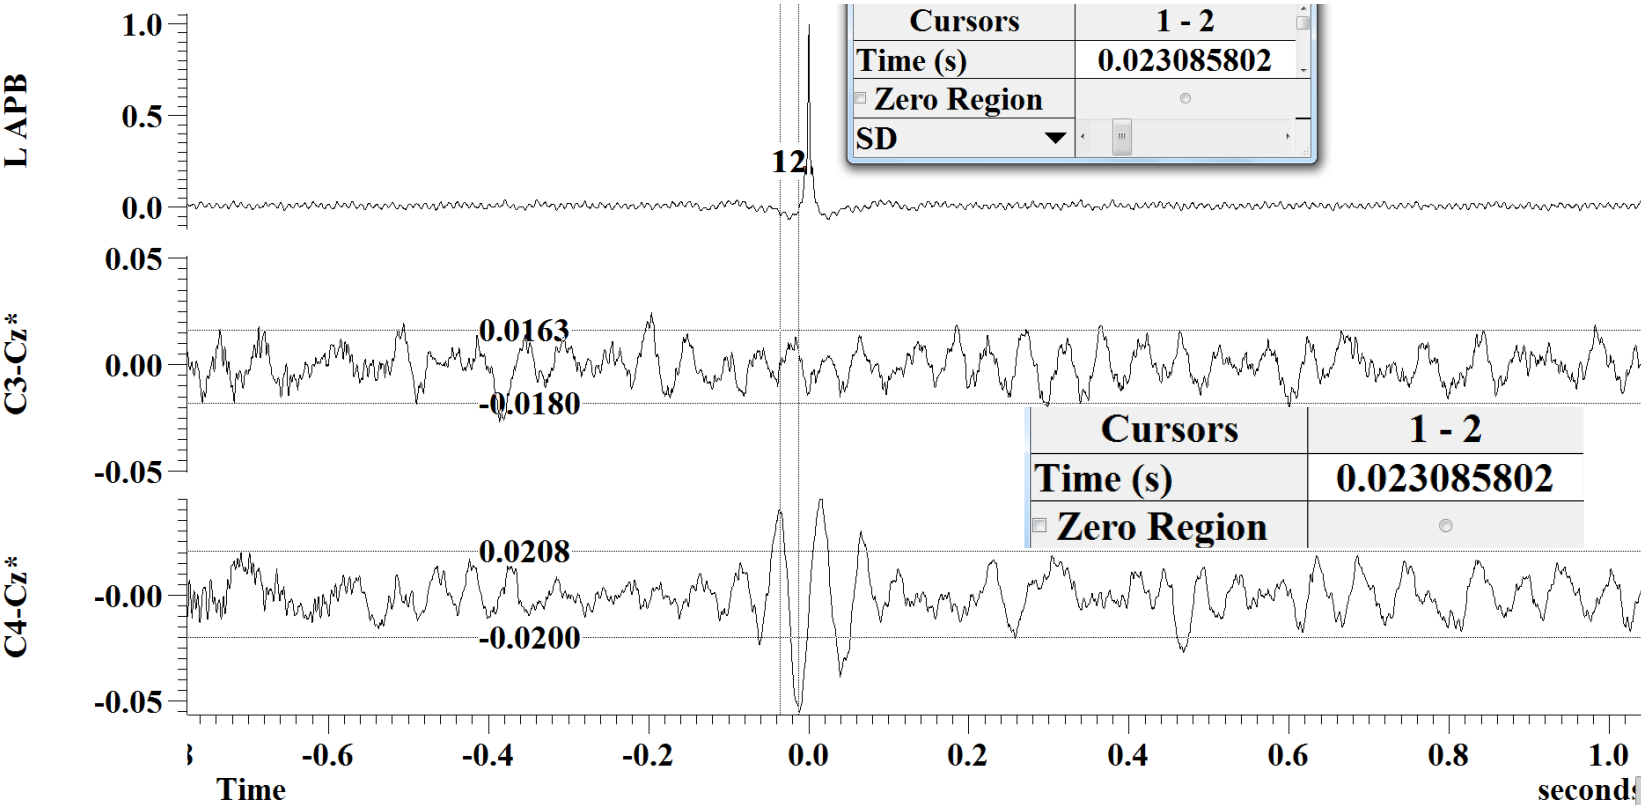

Supplement: 40673_2019_100_MOESM1_ESM.pdf [file 40673_2019_100_MOESM1_ESM.pdf]
